# Supplementary material for: Copper-catalyzed domino sequences: a new route to pyrido-fused quinazolinones from 2′-haloacetophenones and 2-aminopyridines
Source: Royal Society of Chemistry journal article supplement (doi:10.1039/c8ra03744b), 2018-01-01
Supplement: c8ra03744b1.pdf [file c8ra03744b1.pdf]

**Copper-catalyzed domino sequences: A new route to pyrido-fused quinazolinones  
from 2'-haloacetophenones and 2-aminopyridines**

Phuc H. Pham, Son H. Doan, Ngan T. H. Vuong, Vu H. H. Nguyen, Phuong T. M. Ha,  
Nam T. S. Phan\*

Faculty of Chemical Engineering, HCMC University of Technology, VNU-HCM,  
268 Ly Thuong Kiet, District 10, Ho Chi Minh City, Viet Nam

\*Email: [ptsnam@hcmut.edu.vn](mailto:ptsnam@hcmut.edu.vn)

Ph: (+84 8) 38647256 ext. 5681

Fx: (+84 8) 38637504

**Supporting information**

*Materials and instrumentation*

All reagents and starting materials were obtained commercially from Sigma-Aldrich and Merck, and were used as received without any further purification unless otherwise noted. Gas chromatographic (GC) analyses were performed using a Shimadzu GC 2010-Plus equipped with a flame ionization detector (FID) and an SPB-5 column (length = 30 m, inner diameter = 0.25 mm, and film thickness = 0.25  $\mu\text{m}$ ). The temperature program for GC analysis held samples at 120 °C for 0.5 min; heated them from 120 to 130 °C at 40 °C/min; held them at 130 °C for 1 min; heated them from 130 to 280 °C at 40 °C/min; and finally held them at 280 °C for 1.5 min. Inlet and detector temperatures were set constant at 280 °C. The GC yield was calculated using diphenyl ether as the internal standard. GC-MS analyses were analyzed on a Shimadzu GCMS-QP2010Ultra with a ZB-5MS column

(length = 30 m, inner diameter = 0.25 mm, and film thickness = 0.25  $\mu\text{m}$ ). The temperature program for GC-MS analysis held samples at 50  $^{\circ}\text{C}$  for 2 min; heated samples from 50 to 280 $^{\circ}\text{C}$  at 10  $^{\circ}\text{C}/\text{min}$  and held them at 280  $^{\circ}\text{C}$  for 10 min. Inlet temperature was set constant at 280  $^{\circ}\text{C}$ . MS spectra were compared with the spectra gathered in the NIST library. The  $^1\text{H}$  NMR and  $^{13}\text{C}$  NMR were recorded on Bruker AV 500 spectrometers using residual solvent peak as a reference.

#### *Experimental procedure*

To a 12-mL screw-cap vial containing DMSO (0.5 mL) was added 2'-bromoacetophenone (19.9 mg, 0.1 mmol), 2-aminopyridines (23.5 mg, 0.25 mmol), anhydrous NaOAc (16.4 mg, 0.2 mmol),  $\text{Cu}(\text{OAc})_2 \cdot \text{H}_2\text{O}$  (4.0 mg, 0.02 mmol) and diphenyl ether (0.1 mmol) as an internal standard. The catalyst concentration was calculated with respect to the copper/2'-bromoacetophenone molar ratio. The reactor was evacuated and back-filled with oxygen. The resulting mixture was then stirred at 120  $^{\circ}\text{C}$  for 4 h. After that, the mixture was slowly cooled to room temperature, then distilled water (5 mL) was added. The organic components were extracted with dichloromethane (20 mL), dried over anhydrous  $\text{Na}_2\text{SO}_4$  and concentrated under vacuum. The crude product was purified by column chromatography on silica gel with hexane/ethyl acetate as eluent to give pure product. The product identity was further confirmed by GC-MS,  $^1\text{H}$  NMR and  $^{13}\text{C}$  NMR. The reaction yield was monitored by withdrawing aliquots from the reaction mixture, quenched with brine and the organic components were then extracted into ethyl acetate (2 mL), dried over anhydrous  $\text{Na}_2\text{SO}_4$  and analyzed by GC with reference to diphenyl ether.

**Table S1: Effect of varied temperature on the yield of 11H-pyrido[2,1-b]quinazolin-11-one:**

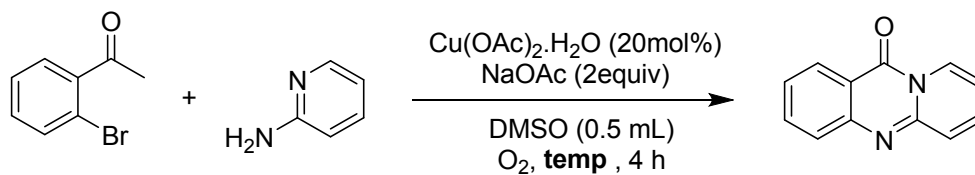

| Entry    | Temperature (°C) | Yield <sup>b</sup> (%) |
|----------|------------------|------------------------|
| 1        | RT               | 0                      |
| 2        | 80               | 46                     |
| 3        | 100              | 58                     |
| <b>4</b> | <b>120</b>       | <b>84</b>              |
| 5        | 140              | 57                     |

<sup>a</sup>Reaction conditions: 2-bromoacetophenone (0.1 mmol); 2-aminopyridine (0.2mmol); DMSO (0.5 mL); Cu(OAc)<sub>2</sub>.H<sub>2</sub>O (20 mol%); NaOAc (2 equiv); **temp**; oxygen atmosphere; 4 h. <sup>b</sup> GC yield of 11H-pyrido[2,1-b]quinazolin-11-one.

**Table S2: Effect of diverse reactant mole proportions on the yield of 11H-pyrido[2,1-b]quinazolin-11-one:**

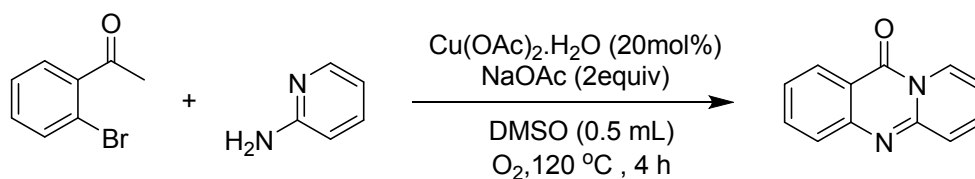

| Entry    | Temperature (°C) | Yield <sup>b</sup> (%) |
|----------|------------------|------------------------|
| 1        | 1:1              | 64                     |
| 2        | 1:1.5            | 75                     |
| 3        | 1:2              | 84                     |
| <b>4</b> | <b>1:2.5</b>     | <b>90</b>              |
| 5        | 1:3              | 92                     |
| 6        | 1.5:1            | 51                     |
| 7        | 2:1              | 33                     |

<sup>a</sup>Reaction conditions: 2-bromoacetophenone (0.1 mmol); DMSO (0.5 mL); Cu(OAc)<sub>2</sub>.H<sub>2</sub>O (20 mol%); NaOAc (2 equiv); 120 °C; oxygen atmosphere; 4 h. <sup>b</sup> GC yield of 11H-pyrido[2,1-b]quinazolin-11-one.

**Table S3: Effect of different catalyst amounts on the yield of 11H-pyrido[2,1-b]quinazolin-11-one:**

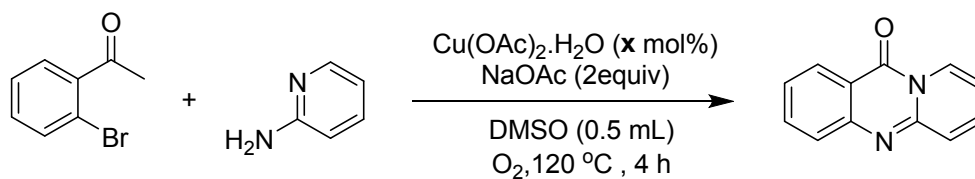

| Entry    | Catalyst amount (mol%) | Yield <sup>b</sup> (%) |
|----------|------------------------|------------------------|
| 1        | 0                      | 0                      |
| 2        | 5                      | 39                     |
| 3        | 10                     | 45                     |
| 4        | 15                     | 67                     |
| <b>5</b> | <b>20</b>              | <b>90</b>              |

<sup>a</sup>Reaction conditions: 2-bromoacetophenone (0.1 mmol); 2-aminopyridine (0.25 mmol); DMSO (0.5 mL); Cu(OAc)<sub>2</sub>.H<sub>2</sub>O (x mol%); NaOAc (2 equiv); 120 °C; oxygen atmosphere; 4 h. <sup>b</sup> GC yield of 11H-pyrido[2,1-b]quinazolin-11-one.

**Table S4: Effect of diverse solvents on the yield of 11H-pyrido[2,1-b]quinazolin-11-one:**

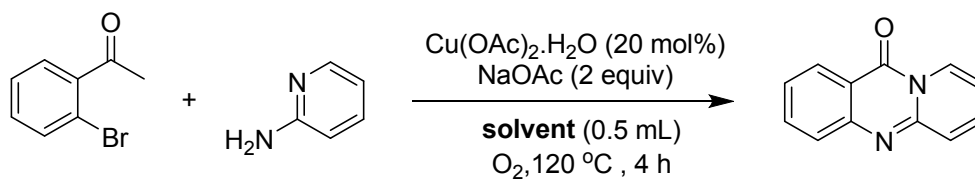

| Entry    | Solvent     | Yield <sup>b</sup> (%) |
|----------|-------------|------------------------|
| 1        | Toluene     | 16                     |
| 2        | Xylene      | 46                     |
| 3        | Dioxane     | 48                     |
| 4        | Diglyme     | 63                     |
| 5        | NMP         | 75                     |
| 6        | DMF         | 41                     |
| 7        | DMAc        | 61                     |
| <b>8</b> | <b>DMSO</b> | <b>90</b>              |
| 9        | DEG         | 25                     |

<sup>a</sup>Reaction conditions: 2-bromoacetophenone (0.1 mmol); 2-aminopyridine (0.25 mmol); solvent (0.5 mL);  $\text{Cu}(\text{OAc})_2 \cdot \text{H}_2\text{O}$  (20 mol%); NaOAc (2 equiv); 120 °C; oxygen atmosphere; 4 h. <sup>b</sup> GC yield of 11H-pyrido[2,1-b]quinazolin-11-one.

**Table S5: Effect of different bases on the yield of 11H-pyrido[2,1-b]quinazolin-11-one:**

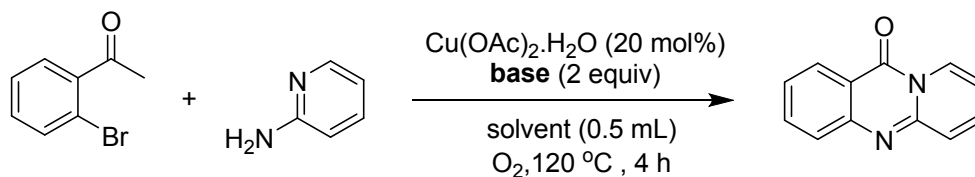

| Entry | Base                     | Yield <sup>b</sup> (%) |
|-------|--------------------------|------------------------|
| 1     | NaOAc                    | 90                     |
| 2     | KOAc                     | 80                     |
| 3     | $\text{NH}_4\text{OAc}$  | 14                     |
| 4     | $\text{NaHCO}_3$         | 19                     |
| 5     | $\text{K}_2\text{CO}_3$  | 6                      |
| 6     | $\text{K}_3\text{PO}_4$  | 4                      |
| 7     | KOH                      | 8                      |
| 8     | Piperidine               | 23                     |
| 9     | $\text{Et}_3\text{N}$    | 2                      |
| 10    | DBU                      | 0                      |
| 11    | Pyridine                 | 11                     |
| 12    | DABCO                    | 7                      |
| 13    | tBuOK                    | 3                      |
| 14    | CsF                      | 0                      |
| 15    | $\text{Cs}_2\text{CO}_3$ | 0                      |

<sup>a</sup>Reaction conditions: 2-bromoacetophenone (0.1 mmol); 2-aminopyridine (0.25 mmol); DMSO (0.5 mL);  $\text{Cu}(\text{OAc})_2 \cdot \text{H}_2\text{O}$  (20 mol%); **base** (2 equiv); 120 °C; oxygen atmosphere; 4 h. <sup>b</sup> GC yield of 11H-pyrido[2,1-b]quinazolin-11-one.

**Table S6: Effect of varied base amounts on the yield of 11H-pyrido[2,1-b]quinazolin-11-one:**

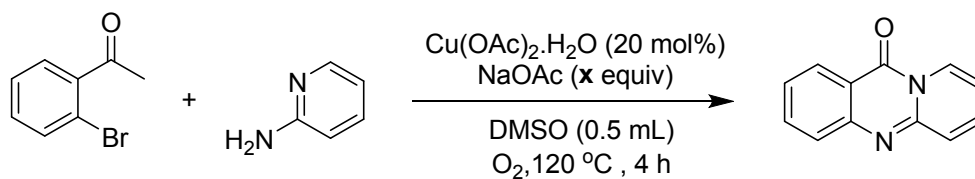

| Entry    | Base amount (equiv.) | Yield <sup>b</sup> (%) |
|----------|----------------------|------------------------|
| 1        | 0                    | 23                     |
| 2        | 0.5                  | 43                     |
| 3        | 1                    | 65                     |
| 4        | 1.5                  | 81                     |
| <b>5</b> | <b>2</b>             | <b>90</b>              |
| 6        | 2.5                  | 77                     |
| 7        | 3                    | 76                     |

<sup>a</sup>Reaction conditions: 2-bromoacetophenone (0.1 mmol); 2-aminopyridine (0.25 mmol); DMSO (0.5 mL); Cu(OAc)<sub>2</sub>·H<sub>2</sub>O (20 mol%); NaOAc (x equiv); 120 °C; oxygen atmosphere; 4 h. <sup>b</sup> GC yield of 11H-pyrido[2,1-b]quinazolin-11-one.



**Table S7: Effect of different catalysts on the yield of 11H-pyrido[2,1-b]quinazolin-**

**11-one:**

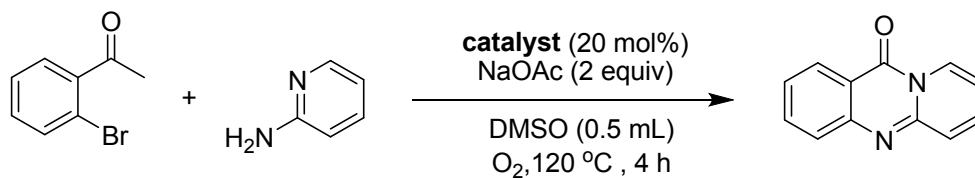

| Entry | Catalysts                                            | Yield <sup>b</sup> (%) |
|-------|------------------------------------------------------|------------------------|
| 1     | Cu(OAc) <sub>2</sub> ·H <sub>2</sub> O               | 90                     |
| 2     | Cu(OAc) <sub>2</sub> anhydrous                       | 79                     |
| 3     | Cu(NO <sub>3</sub> ) <sub>2</sub> ·2H <sub>2</sub> O | 36                     |
| 4     | CuCl <sub>2</sub> ·2H <sub>2</sub> O                 | 63                     |
| 5     | Cu(NO <sub>3</sub> ) <sub>2</sub> ·3H <sub>2</sub> O | 74                     |
| 6     | Cu(acac) <sub>2</sub>                                | 29                     |
| 7     | CuBr <sub>2</sub>                                    | 64                     |
| 8     | CuBr                                                 | 75                     |
| 9     | CuI                                                  | 75                     |
| 10    | Cu powder                                            | 58                     |
| 11    | CuSO <sub>4</sub> anhydrous                          | 36                     |
| 12    | CuO                                                  | 26                     |
| 13    | Cu <sub>2</sub> O                                    | 37                     |
| 14    | Fe(OAc) <sub>2</sub>                                 | 0                      |
| 15    | Ni(OAc) <sub>2</sub> ·4H <sub>2</sub> O              | 0                      |

|    |                                         |   |
|----|-----------------------------------------|---|
| 16 | Co(OAc) <sub>2</sub> ·4H <sub>2</sub> O | 0 |
| 17 | Mn(OAc) <sub>2</sub> ·4H <sub>2</sub> O | 0 |

<sup>a</sup>Reaction conditions: 2-bromoacetophenone (0.1 mmol); 2-aminopyridine (0.25 mmol); DMSO (0.5 mL); **catalyst** (20 mol%); NaOAc (2 equiv); 120 °C; oxygen atmosphere; 4 h. <sup>b</sup> GC yield of 11H-pyrido[2,1-*b*]quinazolin-11-one.

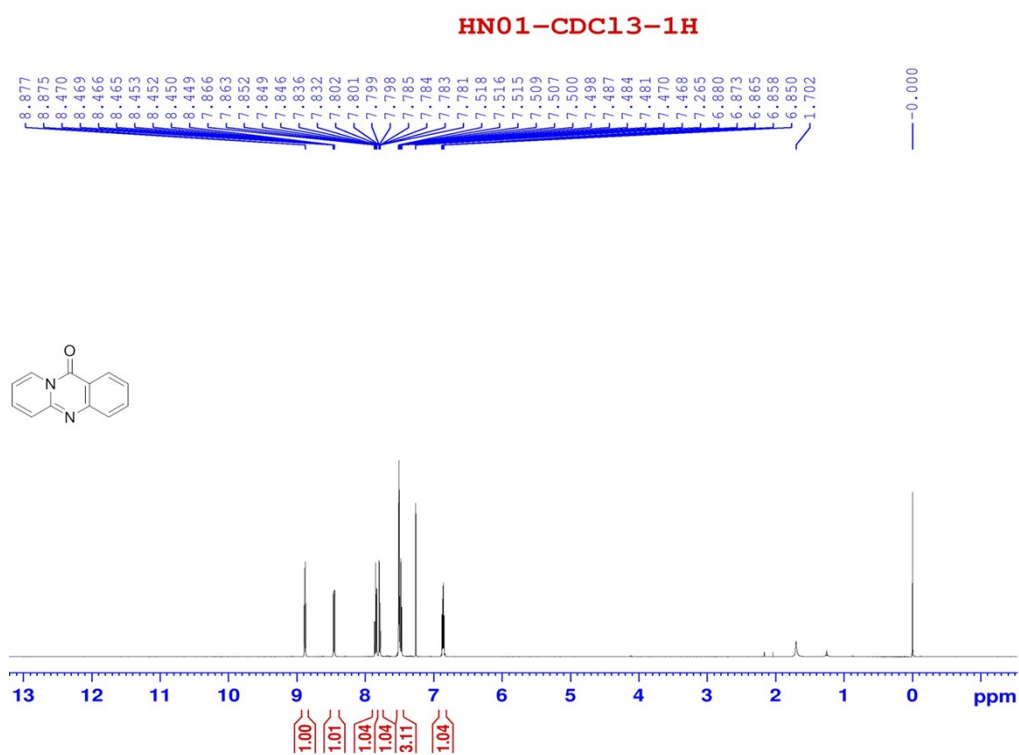

Fig.S1. <sup>1</sup>H-NMR spectra of 11H-pyrido[2,1-*b*]quinazolin-11-one.

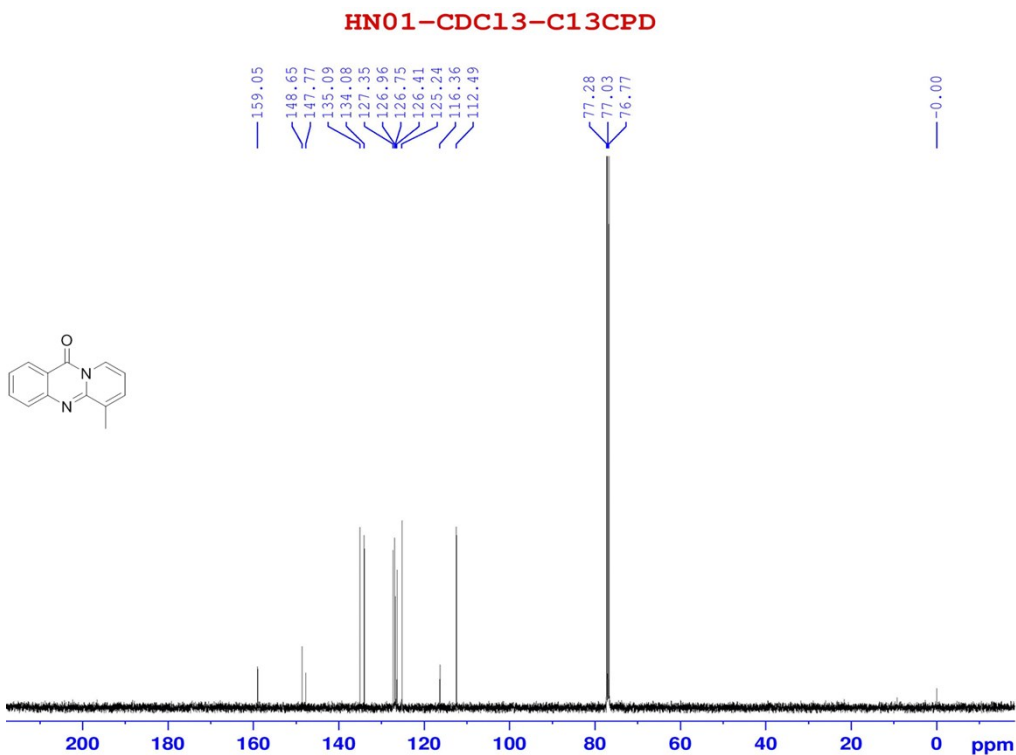

Fig.S2.  $^{13}\text{C}$ -NMR spectra of 11*H*-pyrido[2,1-*b*]quinazolin-11-one.

### Characterization data for 11*H*-pyrido[2,1-*b*]quinazolin-11-one

Prepared as shown in the general experimental procedure and purified on silica gel (230-400 mesh or 37-63  $\mu\text{m}$ , ethyl acetate/hexane = 1:1 (v./v.), TLC silica gel 60 F<sub>254</sub>, R<sub>f</sub> = 0.4): Yellow solid, 87% yield (17 mg).  $^1\text{H}$ -NMR (500 MHz,  $\text{CDCl}_3$ )  $\delta$ (ppm) 6.85–6.88 (m, 1H), 7.46–7.51 (m, 3H), 7.78-7.86 (m, 2H), 8.44-8.47 (m, 1H), 8.88 (dt,  $J$  = 7.5 Hz, 1.0 Hz, 1H).  $^{13}\text{C}$  NMR ( $\text{CDCl}_3$ , 125 MHz)  $\delta$ (ppm) 112.4, 116.3, 125.2, 126.4, 126.7, 126.9, 127.3, 134.0, 135.0, 147.7, 148.6, 159.0. HRMS calcd for  $\text{C}_{12}\text{H}_8\text{N}_2\text{O}$  (M+H)<sup>+</sup>: 197.0709, found (M+H)<sup>+</sup>: 197.0701.

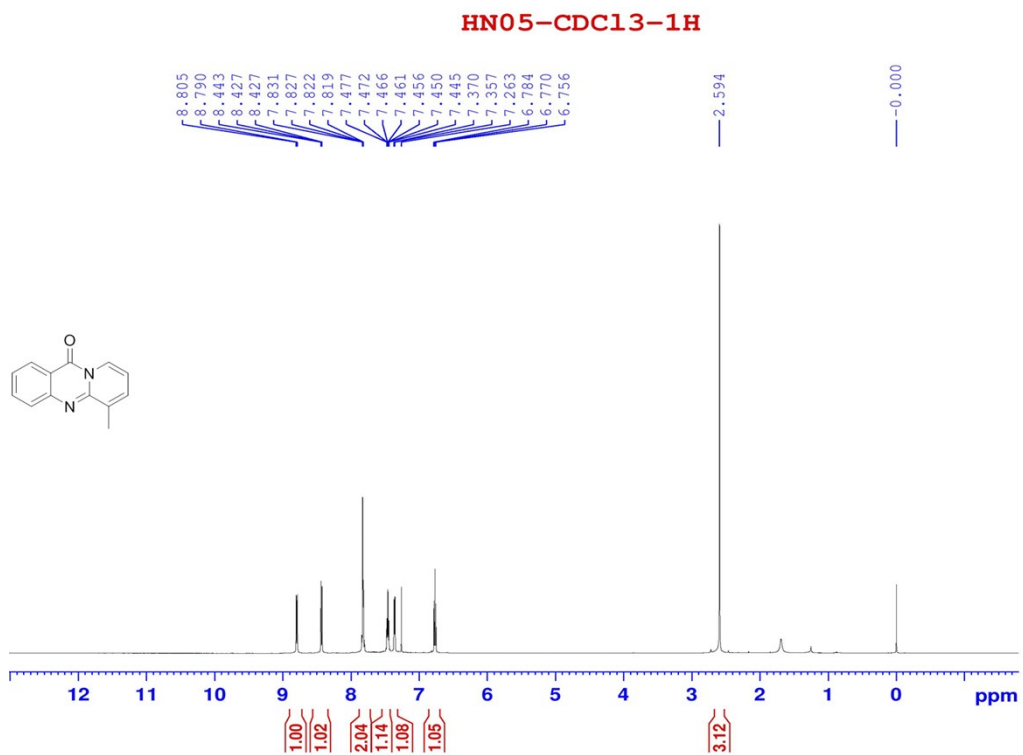

Fig.S3. <sup>1</sup>H-NMR spectra of 6-methyl-11*H*-pyrido[2,1-*b*]quinazolin-11-one.

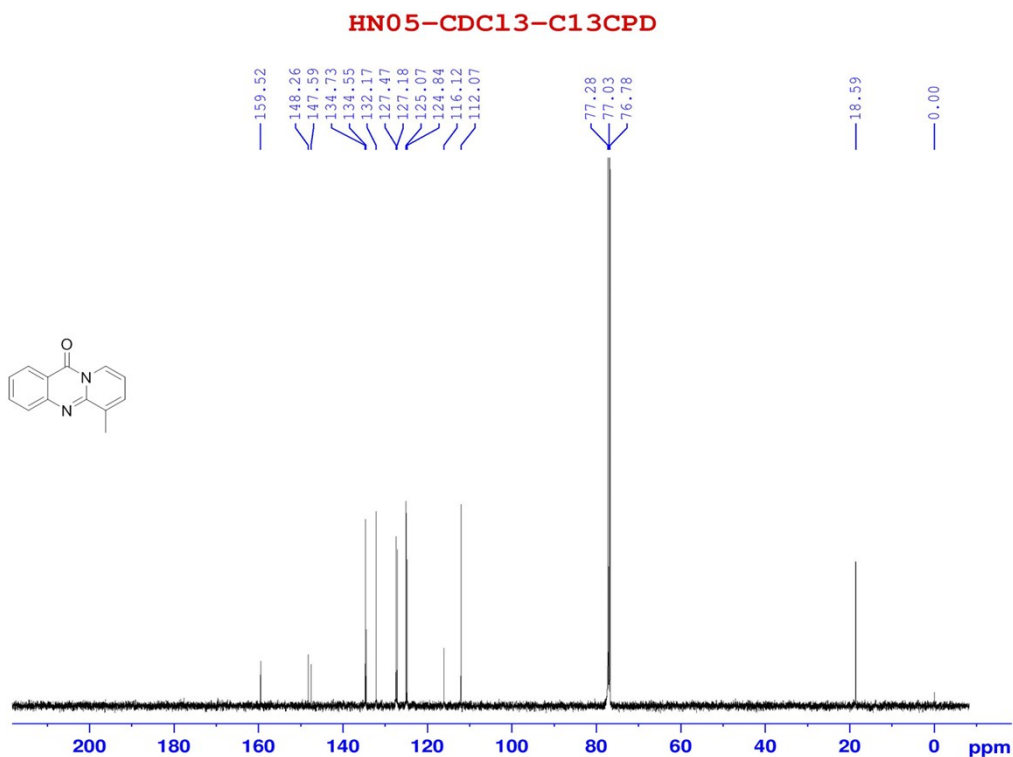

Fig.S4.  $^{13}\text{C}$ -NMR spectra of 6-methyl-11H-pyrido[2,1-b]quinazolin-11-one.

### Characterization data for 6-methyl-11H-pyrido[2,1-b]quinazolin-11-one

Prepared as shown in the general experimental procedure and purified on silica gel (230-400 mesh or 37-63  $\mu\text{m}$ , ethyl acetate/hexane = 1:1 (v./v.), TLC silica gel 60 F<sub>254</sub>, R<sub>f</sub> = 0.45): Yellow solid, 68% yield (14 mg).  $^1\text{H}$ -NMR (500 MHz,  $\text{CDCl}_3$ )  $\delta$ (ppm) 2.59 (s, 3H), 6.77 (t, J = 7.0 Hz, 1H), 7.36 (d, J = 6.5 Hz, 1H), 7.44–7.47 (m, 1H), 7.81–7.83 (m, 2H), 8.43 (d, J = 8.0 Hz, 1H), 8.80 (d, J = 7.5 Hz, 1H).  $^{13}\text{C}$  NMR ( $\text{CDCl}_3$ , 125 MHz)  $\delta$ (ppm) 18.5, 112.0, 116.1, 124.8, 125.0, 127.1, 127.4, 132.1, 134.5, 134.7, 147.5, 148.2, 159.5.

HN06-CDC13-1H

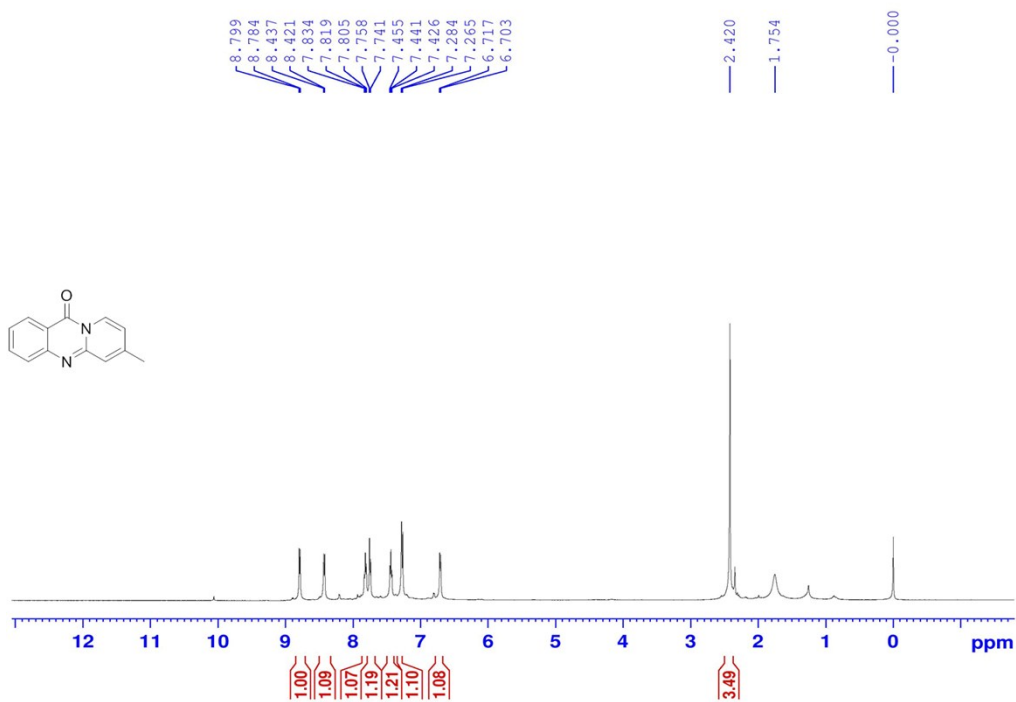

Fig.S5. <sup>1</sup>H-NMR spectra of 7-methyl-11H-pyrido[2,1-b]quinazolin-11-one.

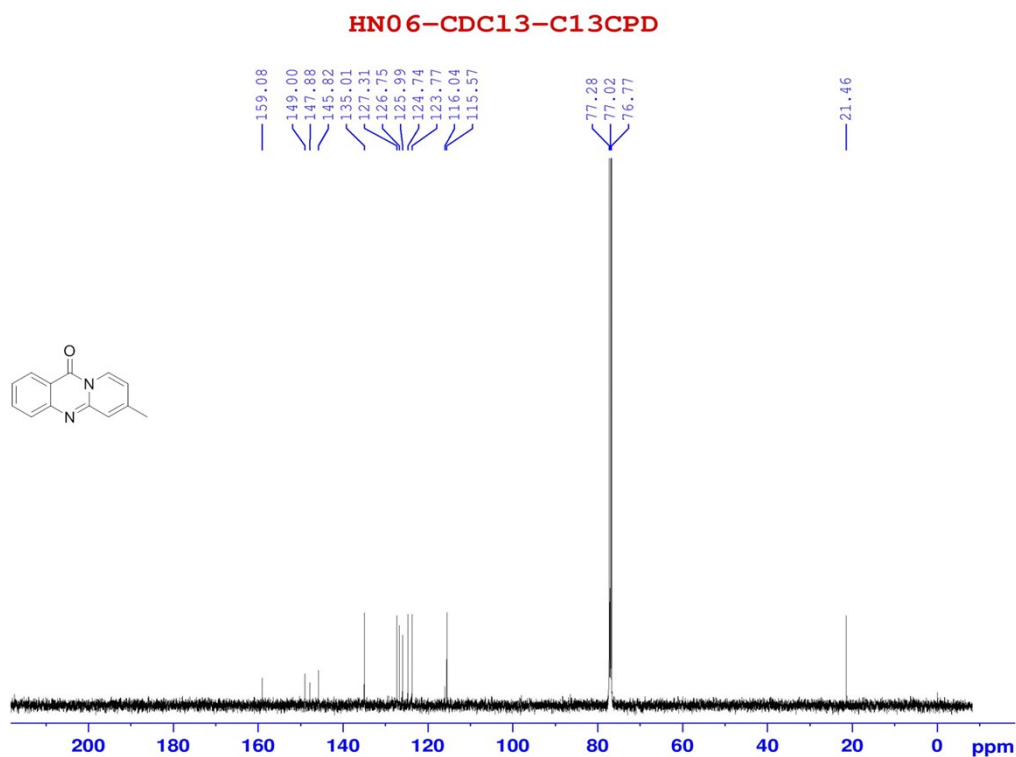

Fig.S6.  $^{13}\text{C}$ -NMR spectra of 7-methyl-11*H*-pyrido[2,1-*b*]quinazolin-11-one.

#### Characterization data for 7-methyl-11*H*-pyrido[2,1-*b*]quinazolin-11-one

Prepared as shown in the general experimental procedure and purified on silica gel (230-400 mesh or 37-63  $\mu\text{m}$ , ethyl acetate/hexane = 1:1 (v./v.), TLC silica gel 60 F<sub>254</sub>, R<sub>f</sub> = 0.45): Yellow solid, 72% yield (15 mg).  $^1\text{H}$ -NMR (500 MHz,  $\text{CDCl}_3$ )  $\delta$ (ppm) 2.42 (s, 3H), 6.70 (d, J = 7.5 Hz, 1H), 7.27 (d, J = 9.5 Hz, 1H), 7.44 (t, J = 7.5 Hz, 1H), 7.75 (d, J = 8.5 Hz, 1H), 7.81 (t, J = 7.5 Hz, 1H), 8.43 (d, J = 9.5 Hz, 1H), 8.79 (d, J = 7.5 Hz, 1H).  $^{13}\text{C}$  NMR ( $\text{CDCl}_3$ , 125 MHz)  $\delta$ (ppm) 21.4, 115.5, 116.0, 123.7, 124.7, 125.9, 126.7, 127.3, 135.0, 145.8, 147.8, 149.0, 159.0.

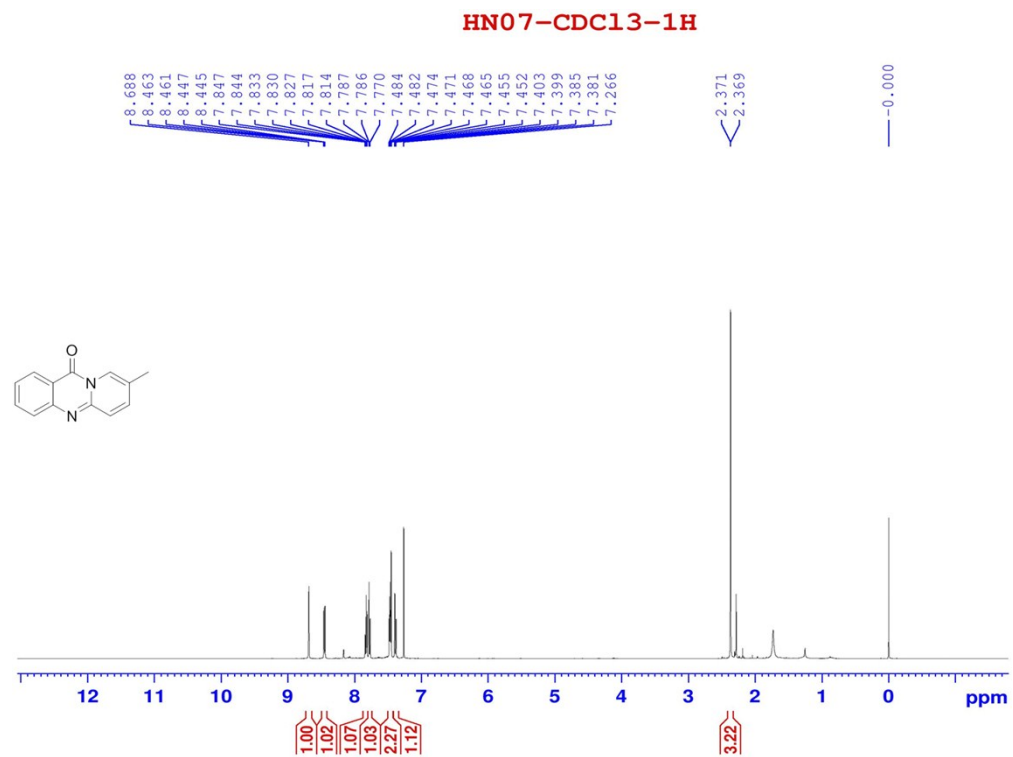

Fig.S7. <sup>1</sup>H-NMR spectra of 8-methyl-11*H*-pyrido[2,1-*b*]quinazolin-11-one.



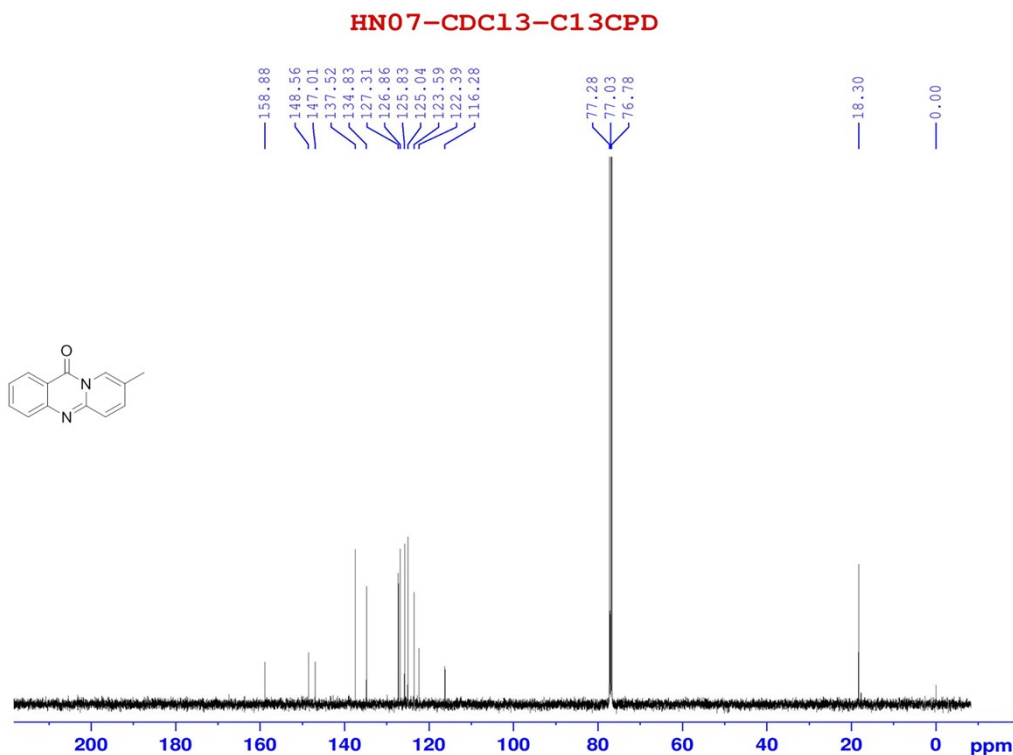

Fig.S8.  $^{13}\text{C}$ -NMR spectra of 8-methyl-11H-pyrido[2,1-b]quinazolin-11-one.

### Characterization data for 8-methyl-11H-pyrido[2,1-b]quinazolin-11-one

Prepared as shown in the general experimental procedure and purified on silica gel (230-400 mesh or 37-63  $\mu\text{m}$ , ethyl acetate/hexane = 1:1 (v./v.), TLC silica gel 60 F<sub>254</sub>, R<sub>f</sub> = 0.45): Yellow solid, 82% yield (17 mg).  $^1\text{H}$ -NMR (500 MHz,  $\text{CDCl}_3$ )  $\delta$ (ppm) 2.37 (d, J = 1 Hz, 3H), 7.39 (dd, J = 9 Hz, 2 Hz, 1H), 7.45–7.48 (m, 2H), 7.78 (dd, J = 8.5 Hz, 0.5 Hz, 1H), 7.83 (td, J = 7.0 Hz, 1.5 Hz, 1H), 8.45 (dd, J = 8.0 Hz, 1.0 Hz, 1H), 8.68 (s, 1H).  $^{13}\text{C}$  NMR ( $\text{CDCl}_3$ , 125 MHz)  $\delta$ (ppm) 18.3, 116.2, 122.3, 123.5, 125.0, 125.8, 126.8, 127.3, 134.8, 137.5, 147.0, 148.5, 158.8.

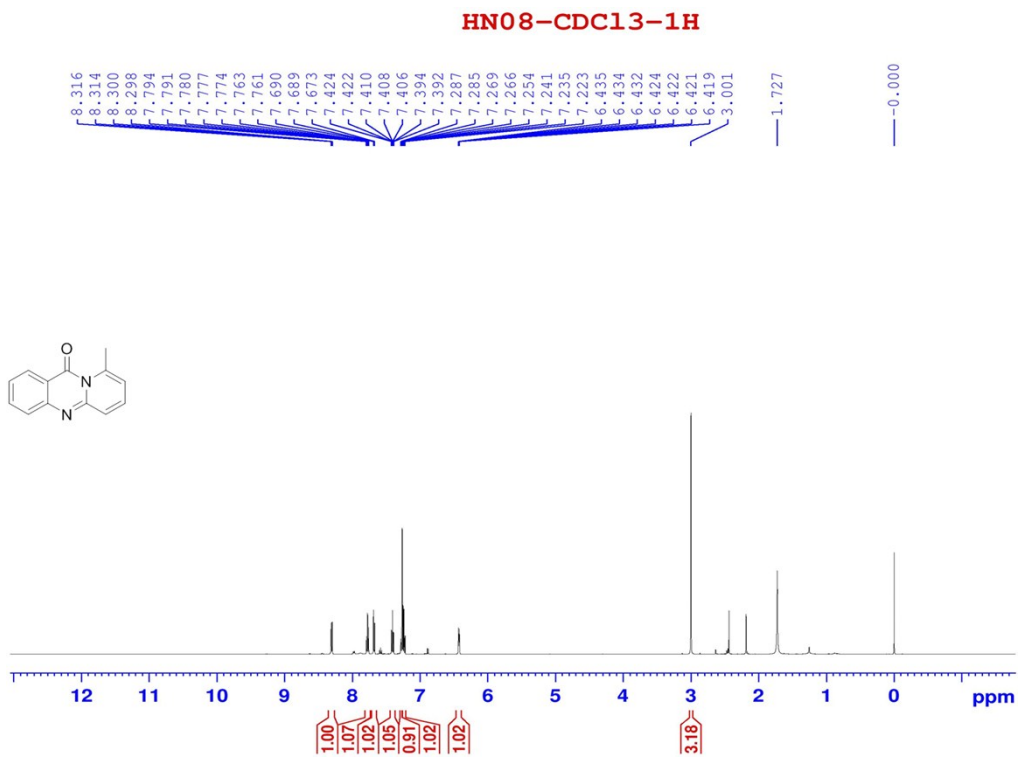

Fig.S9. <sup>1</sup>H-NMR spectra of 9-methyl-11*H*-pyrido[2,1-*b*]quinazolin-11-one.

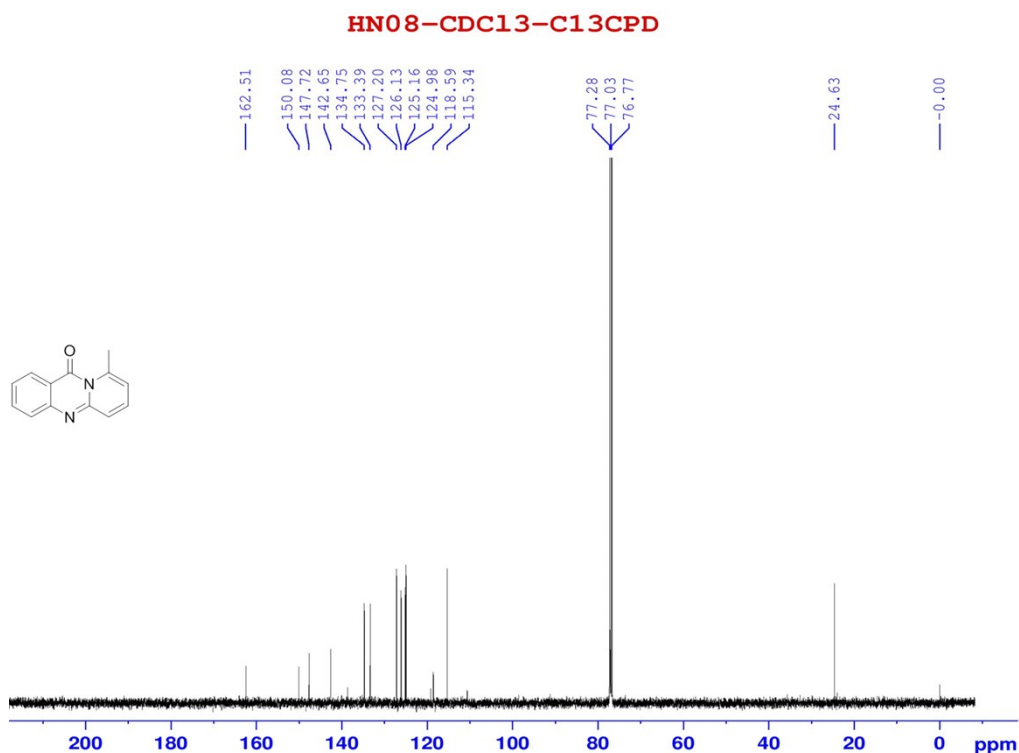

Fig.S10.  $^{13}\text{C}$ -NMR spectra of 9-methyl-11H-pyrido[2,1-b]quinazolin-11-one.

### Characterization data for 9-methyl-11H-pyrido[2,1-b]quinazolin-11-one

Prepared as shown in the general experimental procedure and purified on silica gel (230-400 mesh or 37-63  $\mu\text{m}$ , ethyl acetate/hexane = 1:1 (v./v.), TLC silica gel 60 F<sub>254</sub>, R<sub>f</sub> = 0.45): Yellow solid, 71% yield (15 mg).  $^1\text{H}$ -NMR (500 MHz,  $\text{CDCl}_3$ )  $\delta$ (ppm) 3.00 (s, 3H), 6.43 (dt, J = 6.5 Hz, 1.0 Hz, 1H), 7.22–7.28 (m, 2H), 7.40 (td, J = 7.0 Hz, 1.0 Hz, 1H), 7.68 (dd, J = 8.5 Hz, 0.5 Hz, 1H), 7.79 (td, J = 8.5 Hz, 1.5 Hz, 1H), 8.31 (dd, J = 8.5 Hz, 1.0 Hz, 1H).  $^{13}\text{C}$  NMR ( $\text{CDCl}_3$ , 125 MHz)  $\delta$ (ppm) 24.6, 115.3, 118.5, 124.9, 125.1, 126.1, 127.2, 133.3, 134.7, 142.6, 147.7, 150.0, 162.5.

HN09-CDC13-1H

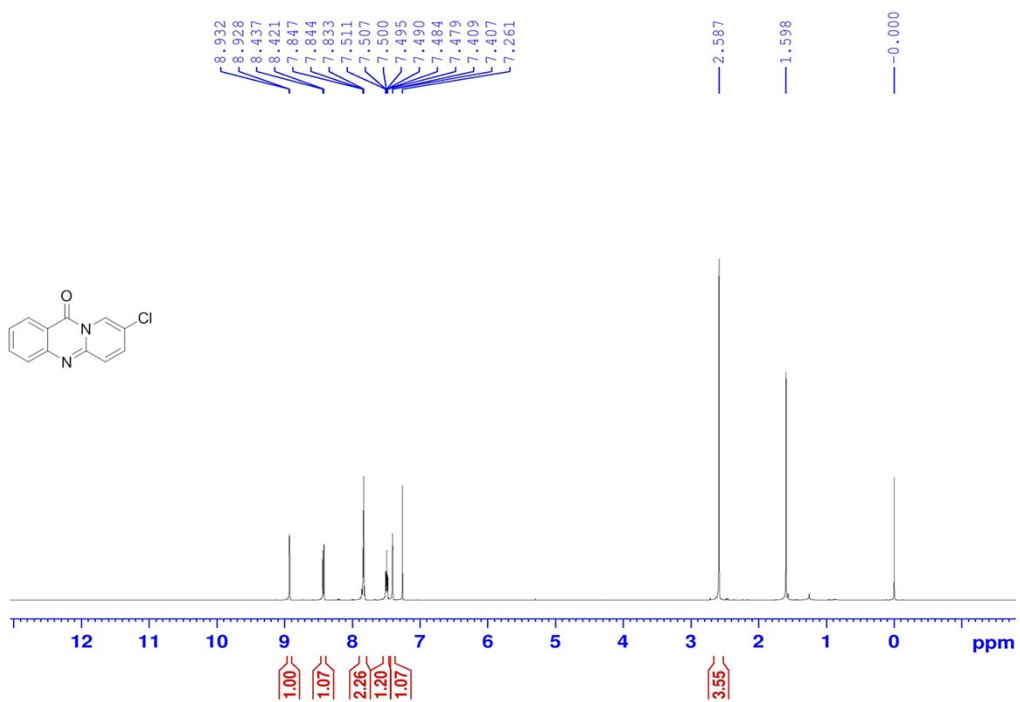

Fig.S11. <sup>1</sup>H-NMR spectra of 8-chloro-11H-pyrido[2,1-b]quinazolin-11-one.

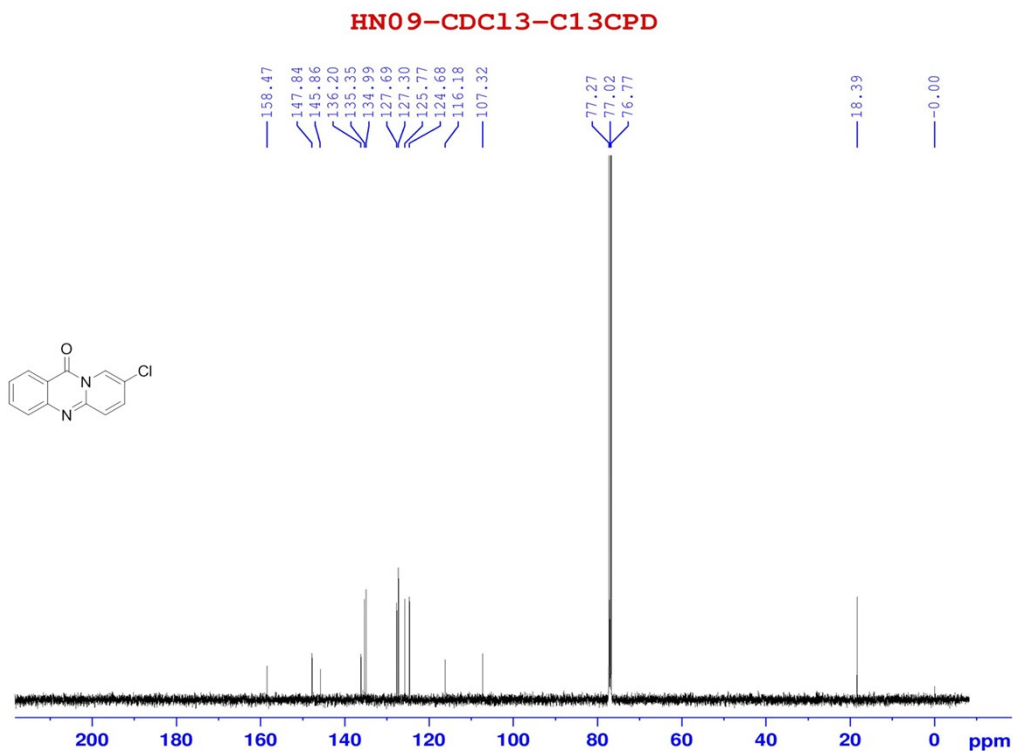

Fig.S12.  $^{13}\text{C}$ -NMR spectra of 8-chloro-11H-pyrido[2,1-b]quinazolin-11-one.

### Characterization data for 8-chloro-11H-pyrido[2,1-b]quinazolin-11-one

Prepared as shown in the general experimental procedure and purified on silica gel (230-400 mesh or 37-63  $\mu\text{m}$ , ethyl acetate/hexane = 1:1 (v./v.), TLC silica gel 60 F<sub>254</sub>, R<sub>f</sub> = 0.4): Yellow solid, 55% yield (16 mg).  $^1\text{H}$ -NMR (500 MHz,  $\text{CDCl}_3$ )  $\delta$ (ppm) 2.58 (s, 3H), 7.40 (s, 1H), 7.47–7.51 (m, 1H), 7.83–7.84 (m, 2H), 8.43 (d, J = 8.0 Hz, 1H), 8.93 (d, J = 2.0 Hz, 1H).  $^{13}\text{C}$  NMR ( $\text{CDCl}_3$ , 125 MHz)  $\delta$ (ppm) 18.3, 107.3, 116.1, 124.6, 125.7, 127.3, 127.6, 134.9, 135.3, 136.2, 145.8, 147.8, 158.4.

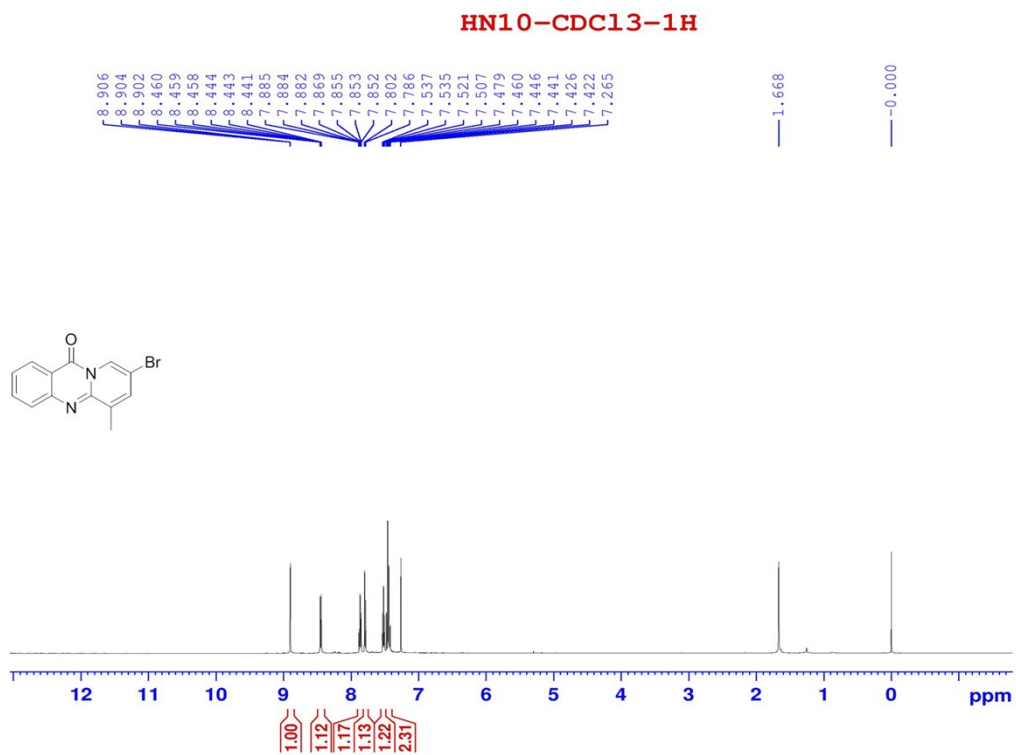

Fig.S13. <sup>1</sup>H-NMR spectra of 8-bromo-6-methyl-11H-pyrido[2,1-b]quinazolin-11-one.

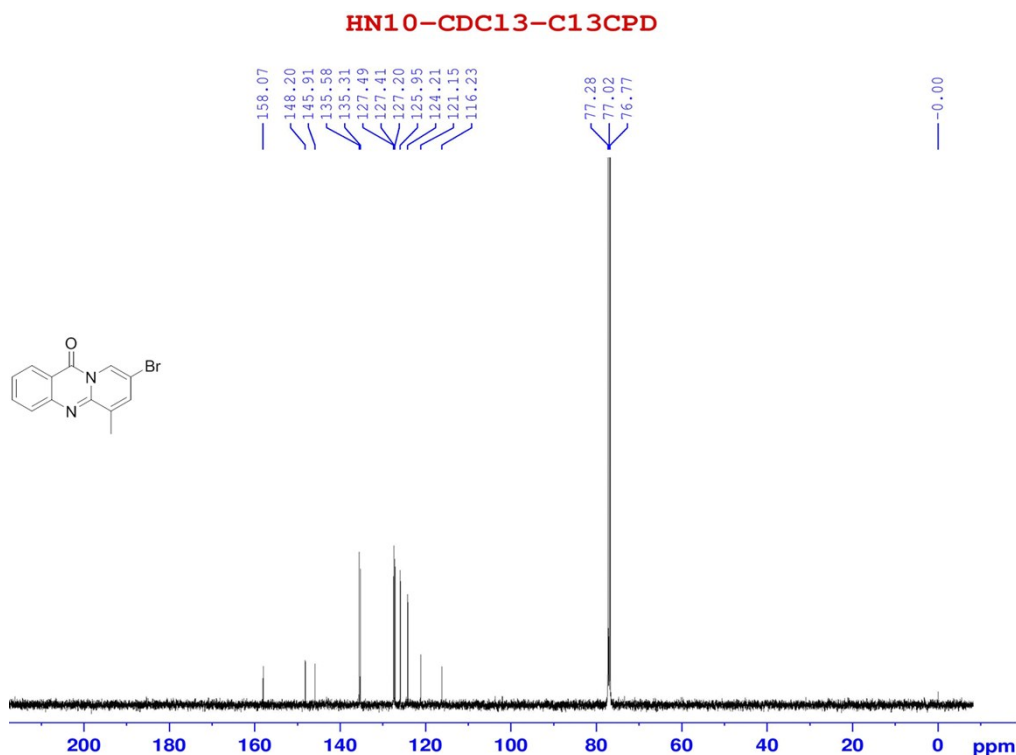

Fig.S14.  $^{13}\text{C}$ -NMR spectra of 8-bromo-6-methyl-11*H*-pyrido[2,1-*b*]quinazolin-11-one.

**Characterization data for 8-bromo-6-methyl-11*H*-pyrido[2,1-*b*]quinazolin-11-one**

Prepared as shown in the general experimental procedure and purified on silica gel (230-400 mesh or 37-63  $\mu\text{m}$ , ethyl acetate/hexane = 1:1 (v./v.), TLC silica gel 60 F<sub>254</sub>, R<sub>f</sub> = 0.4): Yellow solid, 74% yield (17 mg).  $^1\text{H}$ -NMR (500 MHz,  $\text{CDCl}_3$ )  $\delta$ (ppm) 7.42–7.47 (m, 2H), 7.86 (t, J = 7.0 Hz, 1H), 7.79 (d, J = 8.0 Hz, 1H), 7.86 (td, J = 7.5 Hz, 0.5 Hz, 1H), 8.45 (dt, J = 8.0 Hz, 0.5 Hz, 1H), 8.90–8.91 (m, 1H).  $^{13}\text{C}$  NMR ( $\text{CDCl}_3$ , 125 MHz)  $\delta$ (ppm) 116.2, 121.1, 124.2, 125.9, 127.2, 127.4, 127.5, 135.3, 135.5, 145.9, 148.2, 158.0.

HN11-CDC13-1H

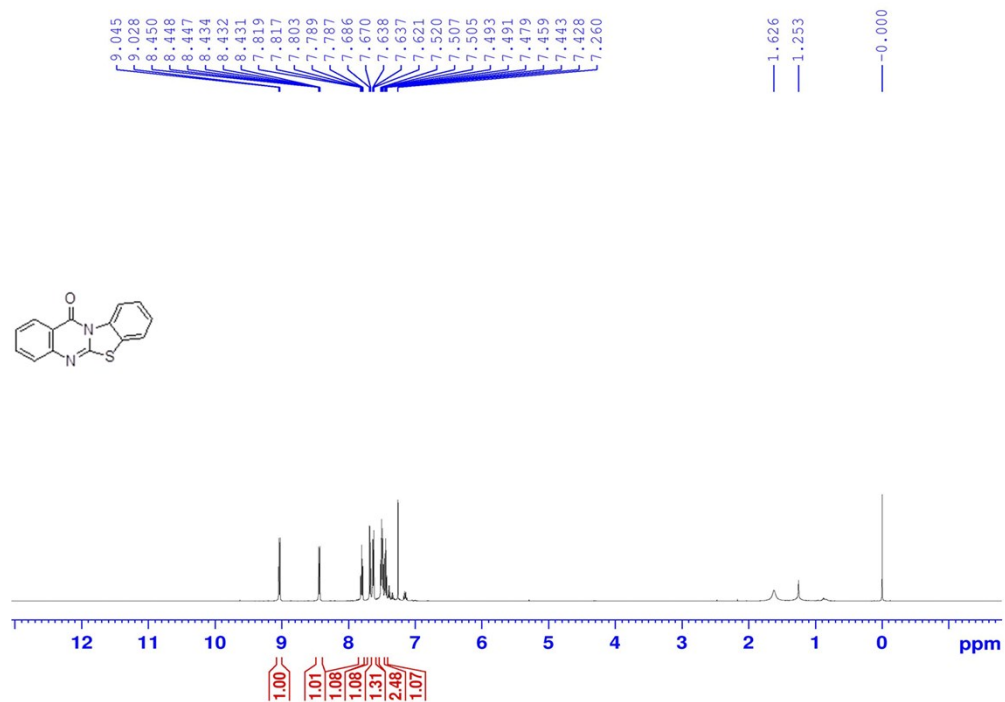

Fig.S15. <sup>1</sup>H-NMR spectra of 12H-benzo[4,5]thiazolo[2,3-b]quinazolin-12-one.



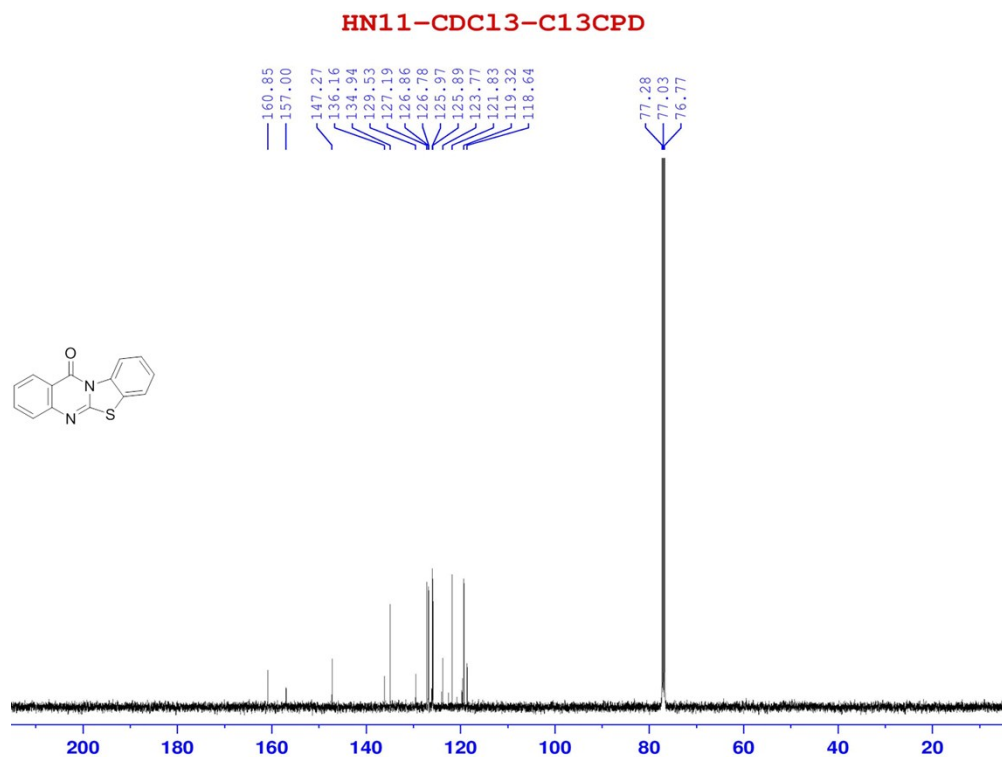

Fig.S16.  $^{13}\text{C}$ -NMR spectra of 12*H*-benzo[4,5]thiazolo[2,3-*b*]quinazolin-12-one.

### Characterization data for 12*H*-benzo[4,5]thiazolo[2,3-*b*]quinazolin-12-one

Prepared as shown in the general experimental procedure and purified on silica gel (230-400 mesh or 37-63  $\mu\text{m}$ , ethyl acetate/hexane = 1:2 (v./v.), TLC silica gel 60 F<sub>254</sub>, R<sub>f</sub> = 0.35): Yellow solid, 57% yield (15 mg).  $^1\text{H}$ -NMR (500 MHz,  $\text{CDCl}_3$ )  $\delta$ (ppm) 7.44 (t, J = 8.0 Hz, 1H), 7.47–7.52 (m, 2H), 7.63 (d, J = 8.5 Hz, 1H), 7.68 (d, J = 8.0 Hz, 1H), 7.80 (t, J = 8.0 Hz, 1H), 8.44 (d, J = 8.0 Hz, 1H), 9.03 (d, J = 8.5 Hz, 1H).  $^{13}\text{C}$  NMR ( $\text{CDCl}_3$ , 125 MHz)  $\delta$ (ppm) 118.6, 119.3, 121.8, 123.7, 125.8, 125.9, 126.7, 126.8, 127.1, 129.5, 134.9, 136.1, 147.2, 160.8.

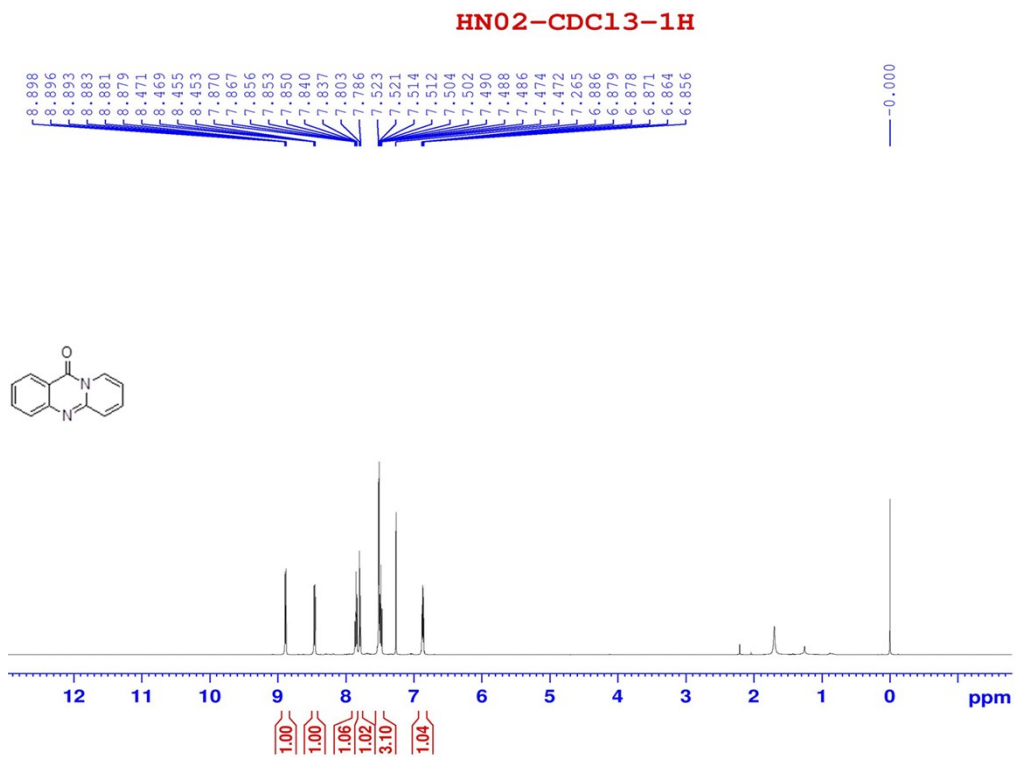

Fig.S17. <sup>1</sup>H-NMR spectra of 11*H*-pyrido[2,1-*b*]quinazolin-11-one.

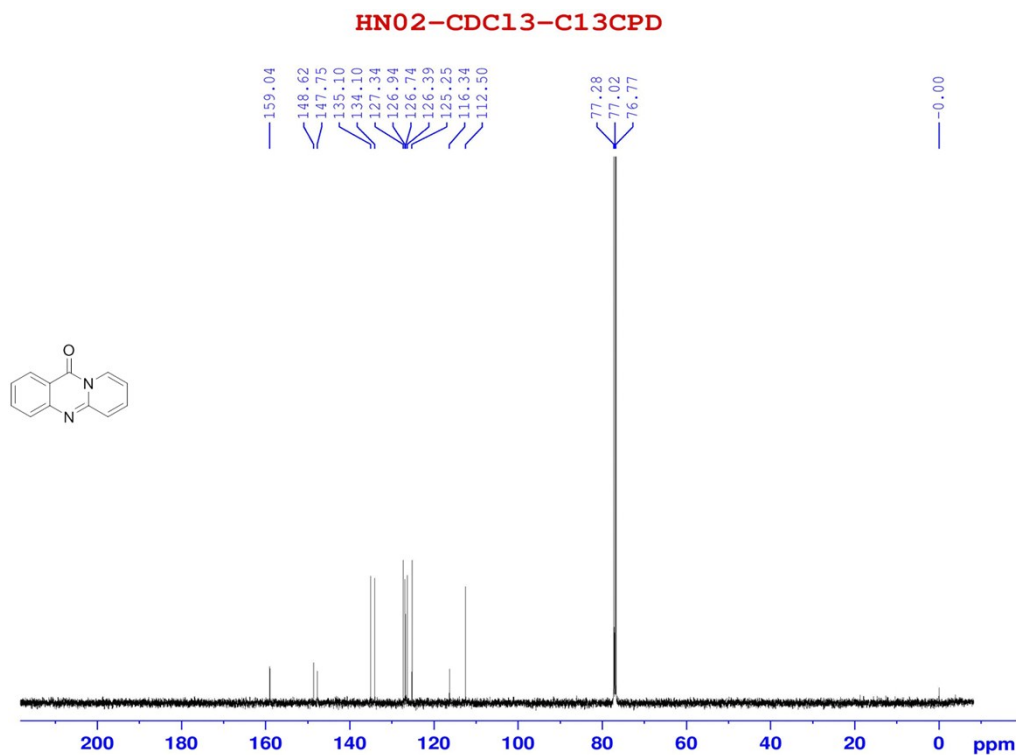

Fig.S18.  $^{13}\text{C}$ -NMR spectra of 11*H*-pyrido[2,1-*b*]quinazolin-11-one.

### Characterization data for 11*H*-pyrido[2,1-*b*]quinazolin-11-one

Prepared as shown in the general experimental procedure and purified on silica gel (230-400 mesh or 37-63  $\mu\text{m}$ , ethyl acetate/hexane = 1:1 (v./v.), TLC silica gel 60 F<sub>254</sub>, R<sub>f</sub> = 0.4): Yellow solid, 89% yield (17 mg).  $^1\text{H}$ -NMR (500 MHz,  $\text{CDCl}_3$ )  $\delta$ (ppm) 6.85–6.88 (m, 1H), 7.47–7.52 (m, 3H), 7.79 (d,  $J$  = 8.0 Hz, 1H), 7.83–7.86 (m, 1H), 8.46 (dd,  $J$  = 8.5 Hz, 1.0 Hz, 1H), 8.88 (dt,  $J$  = 8.5 Hz, 1.0 Hz, 1H).  $^{13}\text{C}$  NMR ( $\text{CDCl}_3$ , 125 MHz)  $\delta$ (ppm) 112.5, 116.3, 125.2, 126.3, 126.7, 126.9, 127.3, 134.1, 135.1, 147.7, 148.6, 159.0

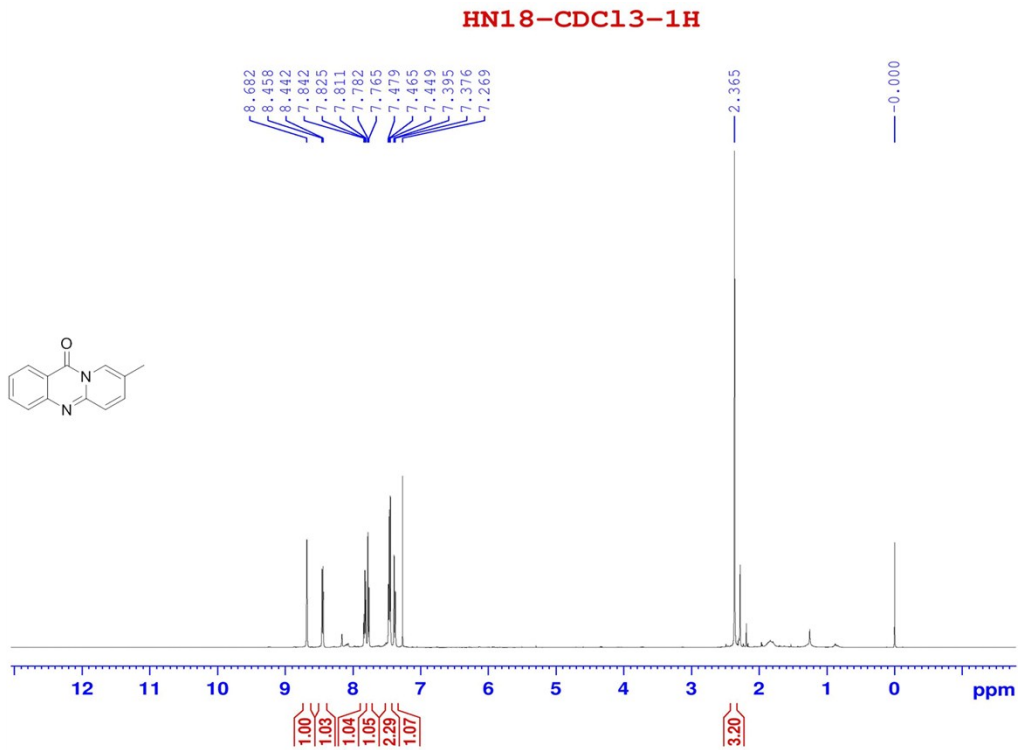

Fig.S19. <sup>1</sup>H-NMR spectra of 8-methyl-11H-pyrido[2,1-b]quinazolin-11-one.

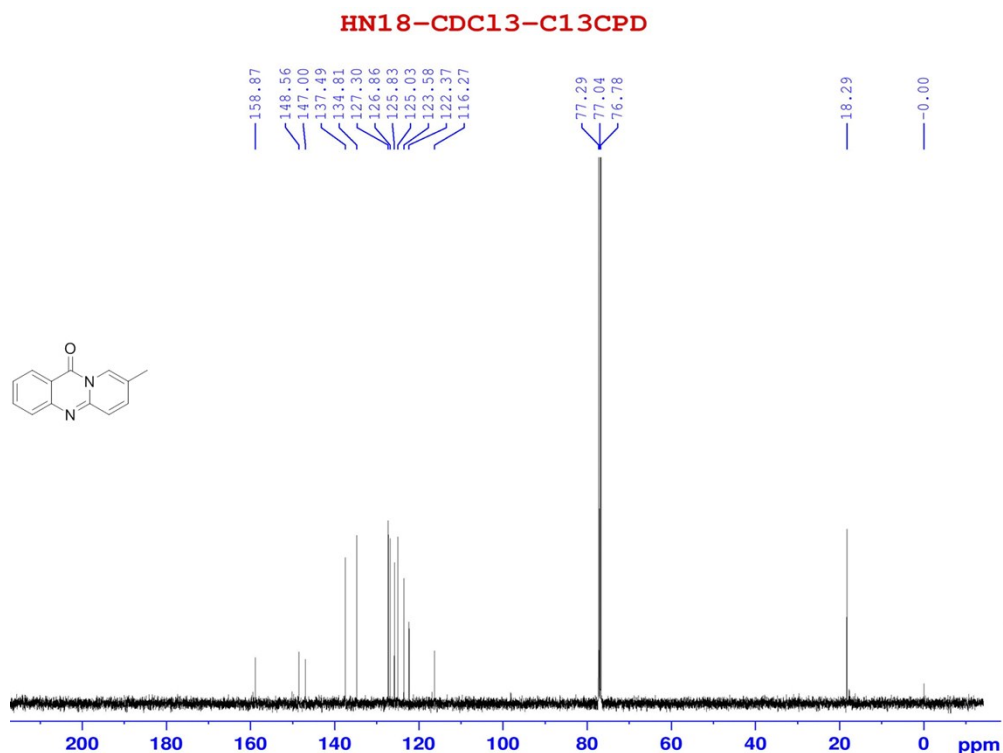

Fig.S20.  $^{13}\text{C}$ -NMR spectra of 8-methyl-11*H*-pyrido[2,1-*b*]quinazolin-11-one.

### Characterization data for 8-methyl-11*H*-pyrido[2,1-*b*]quinazolin-11-one

Prepared as shown in the general experimental procedure and purified on silica gel (230-400 mesh or 37-63  $\mu\text{m}$ , ethyl acetate/hexane = 1:1 (v./v.), TLC silica gel 60 F<sub>254</sub>, R<sub>f</sub> = 0.45): Yellow solid, 87% yield (18 mg).  $^1\text{H}$ -NMR (500 MHz,  $\text{CDCl}_3$ )  $\delta$ (ppm) 2.36 (s,3H), 7.38 (d, J = 9.5 Hz, 1H), 7.45 (d, J = 8.0 Hz, 2H), 7.77 (d, J = 8.5 Hz, 1H), 7.81 – 7.84 (m, 1H), 8.45 (d, J = 8.0 Hz, 1H), 8.68 (s, 1H).  $^{13}\text{C}$  NMR ( $\text{CDCl}_3$ , 125 MHz)  $\delta$ (ppm) 18.2, 116.2, 122.3, 123.5, 125.0, 125.8, 126.8, 127.3, 134.8, 137.4, 147.0, 148.5, 158.8

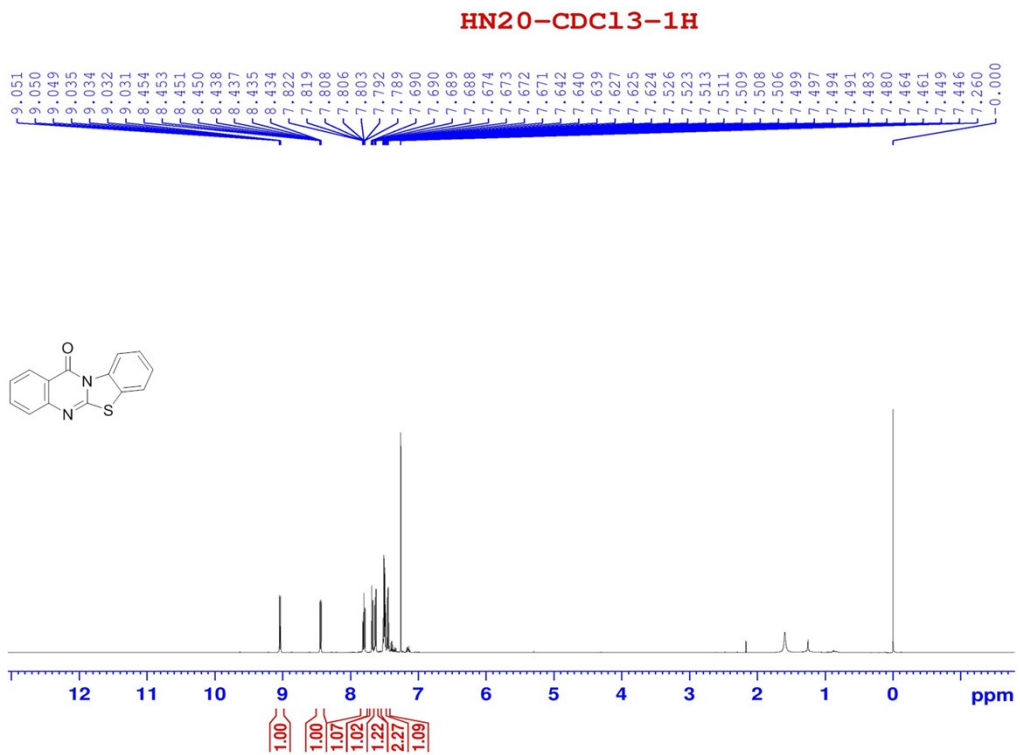

Fig.S21. <sup>1</sup>H-NMR spectra of 12*H*-benzo[4,5]thiazolo[2,3-*b*]quinazolin-12-one.

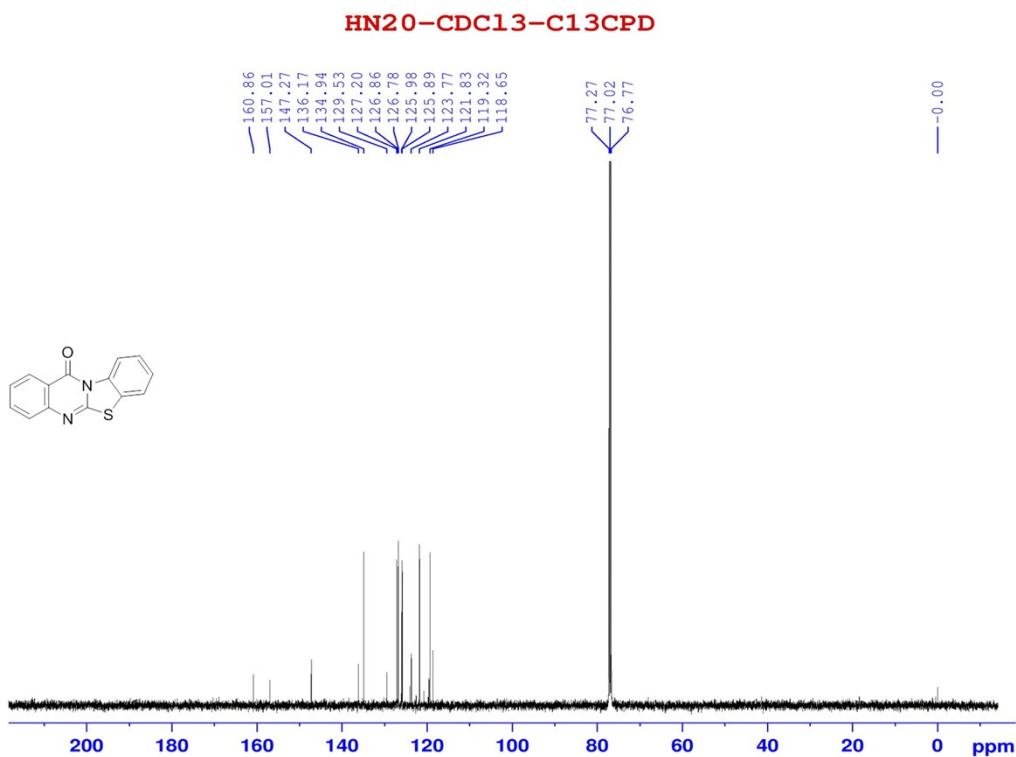

Fig.S22. <sup>13</sup>C-NMR spectra of 12*H*-benzo[4,5]thiazolo[2,3-*b*]quinazolin-12-one.

**Characterization data for 12*H*-benzo[4,5]thiazolo[2,3-*b*]quinazolin-12-one**

Prepared as shown in the general experimental procedure and purified on silica gel (230-400 mesh or 37-63 μm, ethyl acetate/hexane = 1:1 (v./v.), TLC silica gel 60 F<sub>254</sub>, R<sub>f</sub> = 0.35): Yellow solid, 63% yield (16.5 mg). <sup>1</sup>H-NMR (500 MHz, CDCl<sub>3</sub>) δ(ppm) 7.44 (td, J = 7.5 Hz, 1.5 Hz, 1H), 7.48 – 7.52 (m, 2H), 7.62 – 7.64 (m, 1H), 7.67 – 7.69 (m, 1H), 7.78 – 7.82 (m, 1H), 9.03 – 9.05 (m, 1H). <sup>13</sup>C NMR (CDCl<sub>3</sub>, 125 MHz) δ(ppm) 118.6, 119.3, 121.8, 123.7, 125.8, 125.9, 126.7, 126.8, 127.2, 134.9, 136.1, 147.2, 157.0, 160.8

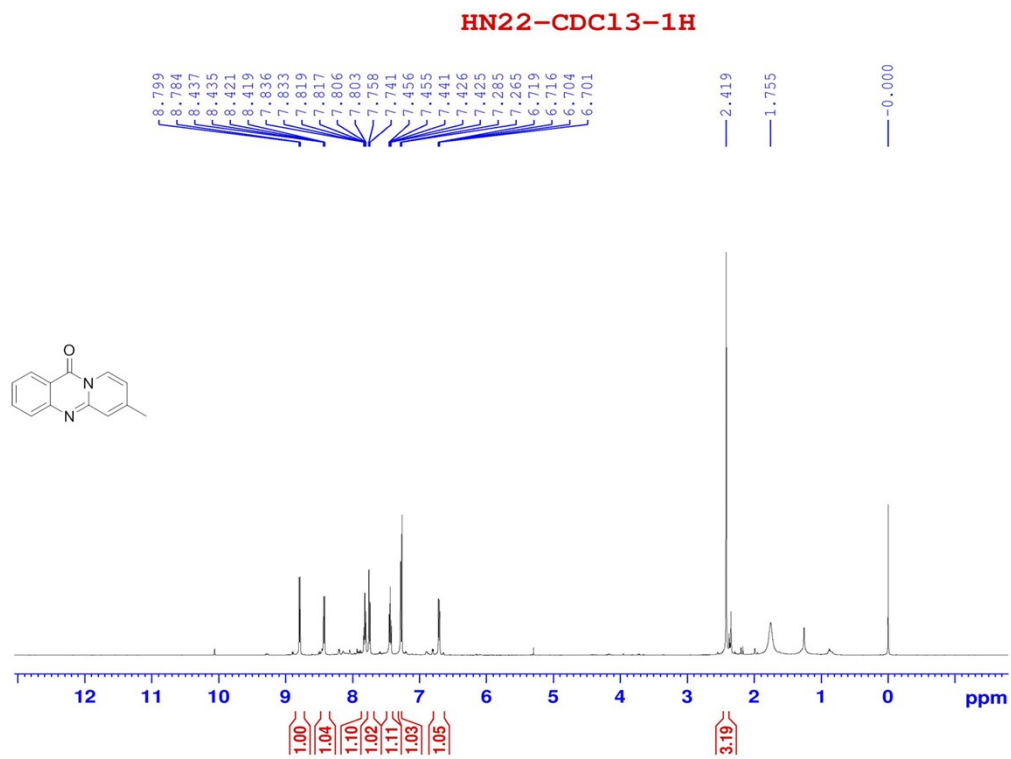

Fig.S23. <sup>1</sup>H-NMR spectra of 7-methyl-11*H*-pyrido[2,1-*b*]quinazolin-11-one.



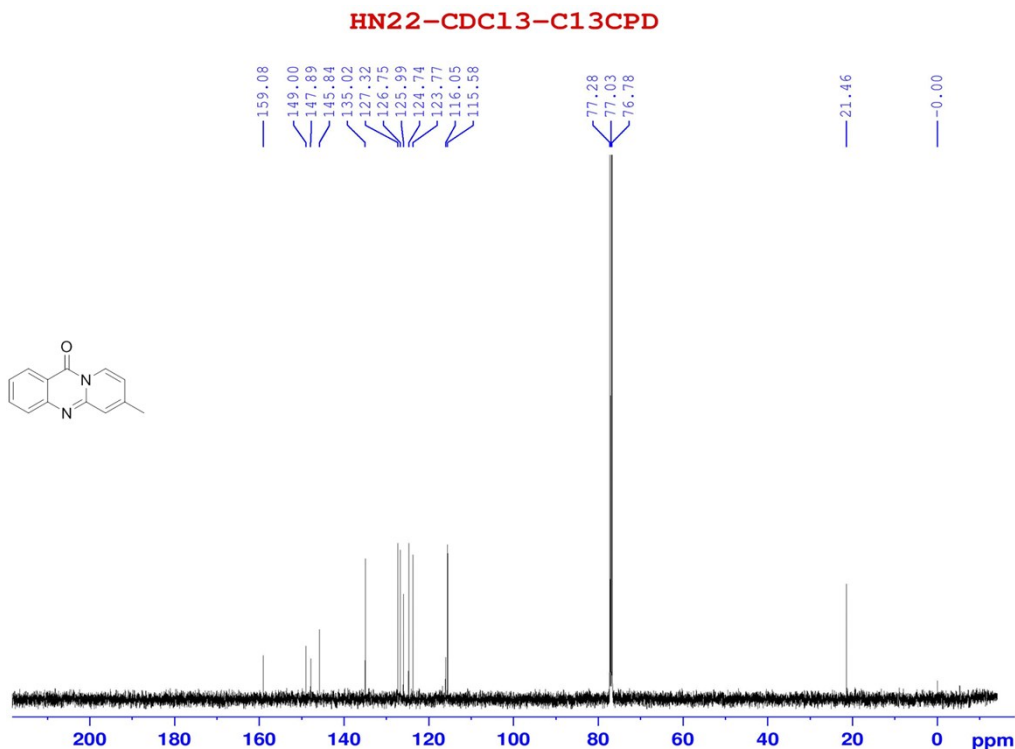

Fig.S24.  $^{13}\text{C}$ -NMR spectra of 7-methyl-11*H*-pyrido[2,1-*b*]quinazolin-11-one.

**Characterization data for 7-methyl-11*H*-pyrido[2,1-*b*]quinazolin-11-one (HN22 – Entry 12)**

Prepared as shown in the general experimental procedure and purified on silica gel (230-400 mesh or 37-63  $\mu\text{m}$ , ethyl acetate/hexane = 1:1 (v/v.), TLC silica gel 60 F<sub>254</sub>, R<sub>f</sub> = 0.45): Yellow solid, 78% yield (16.3 mg).  $^1\text{H}$ -NMR (500 MHz,  $\text{CDCl}_3$ )  $\delta$ (ppm) 2.41 (s, 3H), 6.70 (d, J = 1.5 Hz, 1H), 7.26 – 7.28 (m, 1H), 7.44 (t, J = 7.5 Hz, 1H), 7.75 (d, J = 9.0 Hz, 1H), 7.81 (td, J = 9.0 Hz, 1.5 Hz, 1H), 8.43 (dd, J = 7.5 Hz, 1Hz, 1H), 8.79 (d, J = 7.5 Hz, 1H).  $^{13}\text{C}$  NMR ( $\text{CDCl}_3$ , 125 MHz)  $\delta$ (ppm) 21.4, 115.5, 116.0, 123.7, 124.7, 125.9, 126.7, 127.3, 135.0, 145.8, 147.8, 149.0, 159.0

**Table S8: Effect of strong electron-withdrawing substituents on 2-aminopyridine<sup>a</sup>**

| Entry | Reactant 1                                                                         | Reactant 2                                                                         | Product                                                                             | Isolated Yield (%) |
|-------|------------------------------------------------------------------------------------|------------------------------------------------------------------------------------|-------------------------------------------------------------------------------------|--------------------|
| 1     | 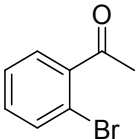  |   |   | Trace              |
| 2     |   |   |   | Trace              |
| 3     |   |   |   | Trace              |
| 4     |  |  |  | Trace              |

<sup>a</sup> Reaction conditions: 2'-bromoacetophenone (0.1 mmol); 2-aminopyridines (0.25 mmol); NaOAc (0.2 mmol); DMSO (0.5 mL); Cu(OAc)<sub>2</sub>·H<sub>2</sub>O catalyst (20 mol%); oxygen atmosphere; 120 °C; 4 h.
